# Supplementary material
Source: publisher site journal article supplement (https://www.spandidos-publications.com/8413/downloadSupplementary)

Figure S1. Expression levels of the 13 model regulatory T cell genes across mLN & tL/B, PE, nLN, nLung, tLung and mBrain groups in the GSE131907 dataset. mLN, metastatic lymph node; tL/B, tumor lung of advanced-stage LUAD; PE, pleural effusion; nLN, normal lymph node; nLung, normal lung; tLung, tumor lung of early-stage LUAD; mBrain, metastatic brain; ASB2, ankyrin repeat and SOCS box protein 2; BIRC3, baculoviral IAP repeat containing 3; CCR6, C-C motif chemokine receptor 6; CENPM, centromere protein M; CISH, cytokine inducible SH2 containing protein; GLCC1, glucocorticoid induced 1; IKZF4, Ikaros family zinc finger protein 4; MAGEH1, melanoma-associated antigen H1; PTTG1, pituitary tumor-transforming gene 1 protein; ZNF101, zinc finger protein 101; ZC3H12D, zinc finger CCCH-type containing 12D.

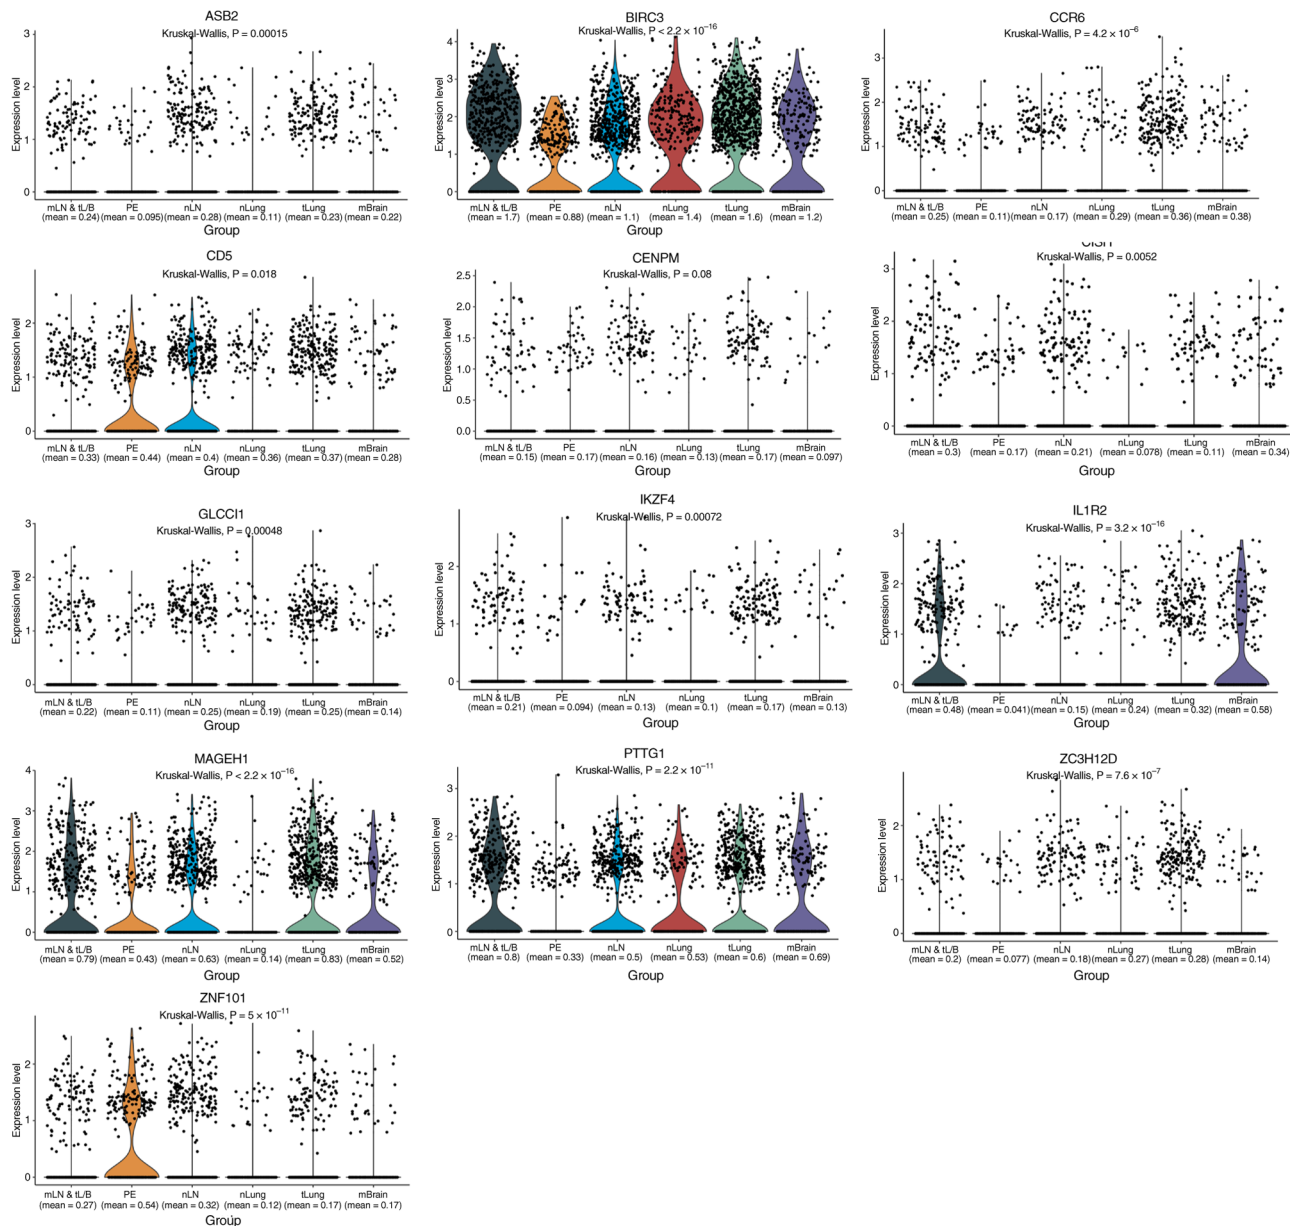

Supplement: Supplementary file 1 [file downloadSupplementary]
